# Supplementary material
Source: ML conference proceedings conference paper supplement (https://proceedings.mlr.press/v97/lerasle19a.html)
Supplement: Supplementary file 1 [file lerasle19a-supp.pdf]

## Supplement

The supplement contains the detailed proofs of our results (Section A), a few technical lemmas used during these arguments (Section B), the McDiarmid inequality for self-containedness (Section C), and the pseudocode of the two-sample test performed in Experiment-2 (Section D).

### A. Proofs of Theorem 1 and Theorem 2

This section contains the detailed proofs of Theorem 1 (Section A.1) and Theorem 2 (Section A.2).

#### A.1. Proof of Theorem 1

The structure of the proof is as follows:

1. We show that  $\|\hat{\mu}_{\mathbb{P},Q} - \mu_{\mathbb{P}}\|_K \leq (1 + \sqrt{2})r_{Q,N}$ , where  $r_{Q,N} = \sup_{f \in B_K} \text{MON}_Q \left[ \underbrace{\langle f, K(\cdot, x) - \mu_{\mathbb{P}} \rangle_K}_{f(x) - \mathbb{P}f} \right]$ , i.e. the analysis can be reduced to  $B_K$ .
2. Then  $r_{Q,N}$  is bounded using empirical processes.

**Step-1:** Since  $\mathcal{H}_K$  is an inner product space, for any  $f \in \mathcal{H}_K$

$$\begin{aligned} & \|f - K(\cdot, x)\|_K^2 - \|\mu_{\mathbb{P}} - K(\cdot, x)\|_K^2 \\ &= \|f - \mu_{\mathbb{P}}\|_K^2 - 2 \langle f - \mu_{\mathbb{P}}, K(\cdot, x) - \mu_{\mathbb{P}} \rangle_K. \end{aligned} \quad (14)$$

Hence, by denoting  $e = \hat{\mu}_{\mathbb{P},Q} - \mu_{\mathbb{P}}$ ,  $\tilde{g} = g - \mu_{\mathbb{P}}$  we get

$$\begin{aligned} & \|e\|_K^2 - 2r_{Q,N} \|e\|_K \\ & \stackrel{(a)}{\leq} \|e\|_K^2 - 2 \text{MON}_Q \left[ \left\langle \frac{e}{\|e\|_K}, K(\cdot, x) - \mu_{\mathbb{P}} \right\rangle \right] \|e\|_K \\ & \stackrel{(b)}{\leq} \text{MON}_Q \left[ \|e\|_K^2 - 2 \left\langle \frac{e}{\|e\|_K}, K(\cdot, x) - \mu_{\mathbb{P}} \right\rangle \right] \|e\|_K \\ & \stackrel{(c)}{\leq} \text{MON}_Q \left[ \|\hat{\mu}_{\mathbb{P},Q} - K(\cdot, x)\|_K^2 - \|\mu_{\mathbb{P}} - K(\cdot, x)\|_K^2 \right] \\ & \stackrel{(d)}{\leq} \sup_{g \in \mathcal{H}_K} \text{MON}_Q \left[ \|\hat{\mu}_{\mathbb{P},Q} - K(\cdot, x)\|_K^2 - \|g - K(\cdot, x)\|_K^2 \right] \\ & \stackrel{(e)}{\leq} \sup_{g \in \mathcal{H}_K} \text{MON}_Q \left[ \|\mu_{\mathbb{P}} - K(\cdot, x)\|_K^2 - \|g - K(\cdot, x)\|_K^2 \right] \\ & \stackrel{(f)}{=} \sup_{g \in \mathcal{H}_K} \left\{ 2 \text{MON}_Q \left[ \underbrace{\langle \tilde{g}, K(\cdot, x) - \mu_{\mathbb{P}} \rangle_K}_{\|\tilde{g}\|_K \langle \frac{\tilde{g}}{\|\tilde{g}\|_K}, K(\cdot, x) - \mu_{\mathbb{P}} \rangle_K} \right] - \|\tilde{g}\|_K^2 \right\} \\ & \stackrel{(g)}{=} \sup_{g \in \mathcal{H}_K} \left\{ 2 \|\tilde{g}\|_K r_{Q,N} - \|\tilde{g}\|_K^2 \right\} \stackrel{(h)}{\leq} r_{Q,N}^2, \end{aligned} \quad (15)$$

where we used in (a) the definition of  $r_{Q,N}$ , (b) the linearity<sup>7</sup> of  $\text{MON}_Q[\cdot]$ , (c) Eq. (14), (d)  $\sup_g$ , (e) the definition of

<sup>7</sup> $\text{MON}_Q[c_1 + c_2 f] = c_1 + c_2 \text{MON}_Q[f]$  for any  $c_1, c_2 \in \mathbb{R}$ .

$\hat{\mu}_{\mathbb{P},Q}$ , (f) Eq. (14) and the linearity of  $\text{MON}_Q[\cdot]$ , (g) the definition of  $r_{Q,N}$ . In step (h), by denoting  $a = \|\tilde{g}\|_K$ ,  $r = r_{Q,N}$ , the argument of the sup takes the form  $2ar - a^2$ ;  $2ar - a^2 \leq r^2 \Leftrightarrow 0 \leq r^2 - 2ar + a^2 = (r - a)^2$ .

In Eq. (15), we obtained an equation  $a^2 - 2ra \leq r^2$  where  $a := \|e\|_K \geq 0$ . Hence  $r^2 + 2ra - a^2 \geq 0$ ,  $r_{1,2} = [-2a \pm \sqrt{4a^2 + 4a^2}]/2 = (-1 \pm \sqrt{2})a$ , thus by the non-negativity of  $a$ ,  $r \geq (-1 + \sqrt{2})a$ , i.e.,  $a \leq \frac{r}{\sqrt{2}-1} = (\sqrt{2} + 1)r$ . In other words, we arrived at

$$\|\hat{\mu}_{\mathbb{P},Q} - \mu_{\mathbb{P}}\|_K \leq (1 + \sqrt{2})r_{Q,N}. \quad (16)$$

It remains to upper bound  $r_{Q,N}$ .

**Step-2:** Our goal is to provide a probabilistic bound on

$$\begin{aligned} r_{Q,N} &= \sup_{f \in B_K} \text{MON}_Q [x \mapsto \langle f, K(\cdot, x) - \mu_{\mathbb{P}} \rangle_K] \\ &= \sup_{f \in B_K} \text{med}_{q \in [Q]} \left\{ \underbrace{\langle f, \mu_{S_q} - \mu_{\mathbb{P}} \rangle_K}_{=: r(f,q)} \right\}. \end{aligned}$$

The  $N_c$  corrupted samples can affect (at most)  $N_c$  of the  $(S_q)_{q \in [Q]}$  blocks. Let  $U := [Q] \setminus C$  stand for the indices of the uncorrupted sets, where  $C := \{q \in [Q] : \exists n_j \text{ s.t. } n_j \in S_q, j \in [N_c]\}$  contains the indices of the corrupted sets. If

$$\forall f \in B_K : \underbrace{|\{q \in U : r(f, q) \geq \epsilon\}|}_{\sum_{q \in U} \mathbb{1}_{r(f,q) \geq \epsilon}} + N_c \leq \frac{Q}{2}, \quad (17)$$

then for  $\forall f \in B_K$ ,  $\text{med}_{q \in [Q]} \{r(f, q)\} \leq \epsilon$ , i.e.  $\sup_{f \in B_K} \text{med}_{q \in [Q]} \{r(f, q)\} \leq \epsilon$ . Thus, our task boils down to controlling the event in (17) by appropriately choosing  $\epsilon$ .

- **Controlling  $r(f, q)$ :** For any  $f \in B_K$  the random variables  $\langle f, k(\cdot, x_i) - \mu_{\mathbb{P}} \rangle_{\mathcal{H}_K} = f(x_i) - \mathbb{P}f$  are independent, have zero mean, and

$$\begin{aligned} \mathbb{E}_{x_i \sim \mathbb{P}} \langle f, k(\cdot, x_i) - \mu_{\mathbb{P}} \rangle_K^2 &= \langle f, \Sigma_{\mathbb{P}} f \rangle_K \\ &\leq \|f\|_K \|\Sigma_{\mathbb{P}} f\|_K \leq \|f\|_K^2 \|\Sigma_{\mathbb{P}}\| = \|\Sigma_{\mathbb{P}}\| \end{aligned} \quad (18)$$

using the reproducing property of the kernel and the covariance operator, the Cauchy-Schwarz (CBS) inequality and  $\|f\|_{\mathcal{H}_K} = 1$ .

For a zero-mean random variable  $z$  by the Chebyshev's inequality  $\mathbb{P}(z > a) \leq \mathbb{P}(|z| > a) \leq \mathbb{E}(z^2)/a^2$ , which implies  $\mathbb{P}\left(z > \sqrt{\mathbb{E}(z^2)/\alpha}\right) \leq \alpha$  by a  $\alpha = \mathbb{E}(z^2)/a^2$  substitution. With  $z := r(f, q)$  ( $q \in U$ ), using  $\mathbb{E}[z^2] = \mathbb{E}\langle f, \mu_{S_q} - \mu_{\mathbb{P}} \rangle_K^2 = \frac{Q}{N} \mathbb{E}_{x_i \sim \mathbb{P}} \langle f, k(\cdot, x_i) - \mu_{\mathbb{P}} \rangle_K^2$  and Eq. (18) one gets that for all  $f \in B_K$ ,  $\alpha \in (0, 1)$  and  $q \in U$ :  $\mathbb{P}\left(r(f, q) > \sqrt{\frac{\|\Sigma_{\mathbb{P}}\|Q}{\alpha N}}\right) \leq \alpha$ . This means

$$\mathbb{P}\left(r(f, q) > \frac{\epsilon}{2}\right) \leq \alpha \text{ with } \epsilon \geq 2\sqrt{\frac{\|\Sigma_{\mathbb{P}}\|Q}{\alpha N}}.$$

- **Reduction to  $\phi$ :** As a result

$$\sum_{q \in U} \mathbb{P} \left( r(f, q) \geq \frac{\epsilon}{2} \right) \leq |U| \alpha$$

happens if and only if

$$\begin{aligned} & \sum_{q \in U} \mathbb{I}_{r(f, q) \geq \epsilon} \\ & \leq |U| \alpha + \sum_{q \in U} \left[ \mathbb{I}_{r(f, q) \geq \epsilon} - \underbrace{\mathbb{P} \left( r(f, q) \geq \frac{\epsilon}{2} \right)}_{\mathbb{E}[\mathbb{I}_{r(f, q) \geq \frac{\epsilon}{2}}]} \right] =: A. \end{aligned}$$

Let us introduce  $\phi : t \in \mathbb{R} \rightarrow (t-1)\mathbb{I}_{1 \leq t \leq 2} + \mathbb{I}_{t \geq 2}$ .  $\phi$  is 1-Lipschitz and satisfies  $\mathbb{I}_{2 \leq t} \leq \phi(t) \leq \mathbb{I}_{1 \leq t}$  for any  $t \in \mathbb{R}$ . Hence, we can upper bound  $A$  as

$$A \leq |U| \alpha + \sum_{q \in U} \left[ \phi \left( \frac{2r(f, q)}{\epsilon} \right) - \mathbb{E} \phi \left( \frac{2r(f, q)}{\epsilon} \right) \right]$$

by noticing that  $\epsilon \leq r(f, q) \Leftrightarrow 2 \leq 2r(f, q)/\epsilon$  and  $\epsilon/2 \leq r(f, q) \Leftrightarrow 1 \leq 2r(f, q)/\epsilon$ , and by using the  $\mathbb{I}_{2 \leq t} \leq \phi(t)$  and the  $\phi(t) \leq \mathbb{I}_{1 \leq t}$  bound, respectively. Taking supremum over  $B_K$  we arrive at

$$\begin{aligned} & \sup_{f \in B_K} \sum_{q \in U} \mathbb{I}_{r(f, q) \geq \epsilon} \\ & \leq |U| \alpha + \underbrace{\sup_{f \in B_K} \sum_{q \in U} \left[ \phi \left( \frac{2r(f, q)}{\epsilon} \right) - \mathbb{E} \phi \left( \frac{2r(f, q)}{\epsilon} \right) \right]}_{=: Z}. \end{aligned}$$

- **Concentration of  $Z$  around its mean:** Notice that  $Z$  is a function of  $x_V$ , the samples in the uncorrupted blocks;  $V = \cup_{q \in U} S_q$ . By the bounded difference property of  $Z$  (Lemma 4) for any  $\beta > 0$ , the McDiarmid inequality (Lemma 6; we choose  $\tau := Q\beta^2/8$  to get linear scaling in  $Q$  on the r.h.s.) implies that

$$\mathbb{P}(Z < \mathbb{E}_{x_V}[Z] + Q\beta) \geq 1 - e^{-\frac{Q\beta^2}{8}}.$$

- **Bounding  $\mathbb{E}_{x_V}[Z]$ :** Let  $M = N/Q$  denote the number of elements in  $S_q$ -s. The  $\mathcal{G} = \{g_f : f \in B_K\}$  class with  $g_f : \mathcal{X}^M \rightarrow \mathbb{R}$  and  $\mathbb{P}_M := \frac{1}{M} \sum_{m=1}^M \delta_{u_m}$  defined as

$$g_f(u_{1:M}) = \phi \left( \frac{\langle f, \mu_{\mathbb{P}_M} - \mu_{\mathbb{P}} \rangle_K}{\epsilon} \right)$$

is uniformly bounded separable Carathéodory (Lemma 5), hence the symmetrization technique (Steinwart & Christmann, 2008, Prop. 7.10), (Ledoux & Talagrand, 1991) gives

$$\mathbb{E}_{x_V}[Z] \leq 2\mathbb{E}_{x_V} \mathbb{E}_{\mathbf{e}} \sup_{f \in B_K} \left| \sum_{q \in U} e_q \phi \left( \frac{2r(f, q)}{\epsilon} \right) \right|,$$

where  $\mathbf{e} = (e_q)_{q \in U} \in \mathbb{R}^{|U|}$  with i.i.d. Rademacher entries  $[\mathbb{P}(e_q = \pm 1) = \frac{1}{2} (\forall q)]$ .

- **Discarding  $\phi$ :** Since  $\phi(0) = 0$  and  $\phi$  is 1-Lipschitz, by Talagrand's contraction principle of Rademacher processes (Ledoux & Talagrand, 1991), (Koltchinskii, 2011, Theorem 2.3) one gets

$$\begin{aligned} & \mathbb{E}_{x_V} \mathbb{E}_{\mathbf{e}} \sup_{f \in B_K} \left| \sum_{q \in U} e_q \phi \left( \frac{2r(f, q)}{\epsilon} \right) \right| \\ & \leq 2\mathbb{E}_{x_V} \mathbb{E}_{\mathbf{e}} \sup_{f \in B_K} \left| \sum_{q \in U} e_q \frac{2r(f, q)}{\epsilon} \right|. \end{aligned}$$

- **Switching from  $|U|$  to  $N$  terms:** Applying an other symmetrization [(a)], the CBS inequality,  $f \in B_K$ , and the Jensen inequality

$$\begin{aligned} & \mathbb{E}_{x_V} \mathbb{E}_{\mathbf{e}} \sup_{f \in B_K} \left| \sum_{q=1}^Q e_q \frac{r(f, q)}{\epsilon} \right| \\ & \stackrel{(a)}{\leq} \frac{2Q}{\epsilon N} \mathbb{E}_{x_V} \mathbb{E}_{\mathbf{e}'} \left[ \sup_{f \in B_K} \underbrace{\left| \sum_{n \in V} e'_n \langle f, K(\cdot, x_n) - \mu_{\mathbb{P}} \rangle_K \right|}_{= \langle f, \sum_{n \in V} e'_n [K(\cdot, x_n) - \mu_{\mathbb{P}}] \rangle_K} \right] \\ & \leq \frac{2Q}{\epsilon N} \mathbb{E}_{x_V} \mathbb{E}_{\mathbf{e}'} \left[ \sup_{f \in B_K} \underbrace{\|f\|_K}_{=1} \left\| \sum_{n \in V} e'_n [K(\cdot, x_n) - \mu_{\mathbb{P}}] \right\|_K \right] \\ & = \frac{2Q}{\epsilon N} \mathbb{E}_{x_V} \mathbb{E}_{\mathbf{e}'} \left\| \sum_{n \in V} e'_n [K(\cdot, x_n) - \mu_{\mathbb{P}}] \right\|_K \\ & \leq \frac{2Q}{\epsilon N} \sqrt{\mathbb{E}_{x_V} \mathbb{E}_{\mathbf{e}'} \left\| \sum_{n \in V} e'_n [K(\cdot, x_n) - \mu_{\mathbb{P}}] \right\|_K^2} \\ & \stackrel{(b)}{\leq} \frac{2Q \sqrt{|V| \text{Tr}(\Sigma_{\mathbb{P}})}}{\epsilon N}. \end{aligned}$$

In (a), we proceed as follows:

$$\begin{aligned} & \mathbb{E}_{x_V} \mathbb{E}_{\mathbf{e}} \sup_{f \in B_K} \left| \sum_{q \in U} e_q \frac{r(f, q)}{\epsilon} \right| \\ & = \mathbb{E}_{x_V} \mathbb{E}_{\mathbf{e}} \sup_{f \in B_K} \left| \sum_{q \in U} e_q \frac{\langle f, \mu_{S_q} - \mu_{\mathbb{P}} \rangle_K}{\epsilon} \right| \\ & \stackrel{(c)}{\leq} \frac{2Q}{N\epsilon} \mathbb{E}_{x_V} \mathbb{E}_{\mathbf{e}} \mathbb{E}_{\mathbf{e}'} \sup_{f \in B_K} \left| \sum_{n \in V} e'_n e''_n \langle f, K(\cdot, x_n) - \mu_{\mathbb{P}} \rangle_K \right| \\ & = \frac{2Q}{N\epsilon} \mathbb{E}_{x_V} \mathbb{E}_{\mathbf{e}'} \sup_{f \in B_K} \left| \sum_{n \in V} e'_n \langle f, K(\cdot, x_n) - \mu_{\mathbb{P}} \rangle_K \right|, \end{aligned}$$

where in (c) we applied symmetrization,  $\mathbf{e}' = (e'_n)_{n \in V} \in \mathbb{R}^{|V|}$  with i.i.d. Rademacher entries,  $e''_n = e_q$  if  $n \in S_q$  ( $q \in U$ ), and



**• Median rephrasing:**

$$\begin{aligned}
 & \sup_{f \in B_K} \left| \text{med}_{q \in [Q]} \{r(f, q)\} \right| \leq \epsilon \\
 & \Leftrightarrow \forall f \in B_K : -\epsilon \leq \text{med}_{q \in [Q]} \{r(f, q)\} \leq \epsilon \\
 & \Leftrightarrow \forall f \in B_K : |\{q : r(f, q) \leq -\epsilon\}| \leq Q/2 \\
 & \quad \text{and } |\{q : r(f, q) \geq \epsilon\}| \leq Q/2 \\
 & \Leftrightarrow \forall f \in B_K : |\{q : |r(f, q)| \geq \epsilon\}| \leq Q/2.
 \end{aligned}$$

Thus,  $\forall f \in B_K : |\{q \in U : |r(f, q)| \geq \epsilon\}| + N_c \leq \frac{Q}{2}$ ,

implies  $\sup_{f \in B_K} \left| \text{med}_{q \in [Q]} \{r(f, q)\} \right| \leq \epsilon$ .

**• Controlling  $|r(f, q)|$ :** For any  $f \in B_K$  the random variables  $[f(x_i) - f(y_i)] - [\mathbb{P}f - \mathbb{Q}f]$  are independent, zero-mean and

$$\begin{aligned}
 & \mathbb{E}_{(x, y) \sim \mathbb{P} \otimes \mathbb{Q}} ([f(x) - \mathbb{P}f] - [f(y) - \mathbb{Q}f])^2 \\
 & = \mathbb{E}_{x \sim \mathbb{P}} [f(x) - \mathbb{P}f]^2 + \mathbb{E}_{y \sim \mathbb{Q}} [f(y) - \mathbb{Q}f]^2 \\
 & \leq \|\Sigma_{\mathbb{P}}\| + \|\Sigma_{\mathbb{Q}}\|,
 \end{aligned}$$

where  $\mathbb{P} \otimes \mathbb{Q}$  is the product measure. The Chebyshev argument with  $z = |r(f, q)|$  implies that  $\forall \alpha \in (0, 1)$

$$(\mathbb{P} \otimes \mathbb{Q}) \left( |r(f, q)| > \sqrt{\frac{(\|\Sigma_{\mathbb{P}}\| + \|\Sigma_{\mathbb{Q}}\|)Q}{\alpha N}} \right) \leq \alpha.$$

This means  $(\mathbb{P} \otimes \mathbb{Q}) (|r(f, q)| > \epsilon/2) \leq \alpha$  with  $\epsilon \geq 2\sqrt{\frac{(\|\Sigma_{\mathbb{P}}\| + \|\Sigma_{\mathbb{Q}}\|)Q}{\alpha N}}$ .

**• Switching from  $|U|$  to  $N$  terms:** With  $(xy)_V = \{(x_i, y_i) : i \in V\}$ , in '(b)' with  $\tilde{x}_n := K(\cdot, x_n) - \mu_{\mathbb{P}}$ ,  $\tilde{y}_n := K(\cdot, y_n) - \mu_{\mathbb{Q}}$  we arrive at

$$\begin{aligned}
 & \mathbb{E}_{(xy)_V} \mathbb{E}_{e'} \left\| \sum_{n \in V} e'_n (\tilde{x}_n - \tilde{y}_n) \right\|_K^2 \\
 & = \mathbb{E}_{(xy)_V} \mathbb{E}_{e'} \sum_{n \in V} [e'_n]^2 \langle \tilde{x}_n - \tilde{y}_n, \tilde{x}_n - \tilde{y}_n \rangle_K \\
 & = |V| \mathbb{E}_{(xy) \sim \mathbb{P}} \|[K(\cdot, x) - \mu_{\mathbb{P}}] - [K(\cdot, y) - \mu_{\mathbb{Q}}]\|_K \\
 & = |V| [\text{Tr}(\Sigma_{\mathbb{P}}) + \text{Tr}(\Sigma_{\mathbb{Q}})].
 \end{aligned}$$

**• These results imply**

$$Q\alpha + Q\beta + \frac{8Q\sqrt{\text{Tr}(\Sigma_{\mathbb{P}}) + \text{Tr}(\Sigma_{\mathbb{Q}})}}{\epsilon\sqrt{N}} + N_c \leq Q/2.$$

$$\epsilon \geq \max \left( 2\sqrt{\frac{3(\|\Sigma_{\mathbb{P}}\| + \|\Sigma_{\mathbb{Q}}\|)Q}{\delta N}}, \frac{24}{\delta} \sqrt{\frac{\text{Tr}(\Sigma_{\mathbb{P}}) + \text{Tr}(\Sigma_{\mathbb{Q}})}{N}} \right),$$

$\alpha = \beta = \frac{\delta}{3}$  choice gives that

$$\begin{aligned}
 & \left| \widehat{\text{MMD}}_Q(\mathbb{P}, \mathbb{Q}) - \text{MMD}(\mathbb{P}, \mathbb{Q}) \right| \\
 & \leq 2 \max \left( \sqrt{\frac{3(\|\Sigma_{\mathbb{P}}\| + \|\Sigma_{\mathbb{Q}}\|)Q}{\delta N}}, \frac{12}{\delta} \sqrt{\frac{\text{Tr}(\Sigma_{\mathbb{P}}) + \text{Tr}(\Sigma_{\mathbb{Q}})}{N}} \right)
 \end{aligned}$$

with probability at least  $1 - e^{-\frac{Q\delta^2}{72}}$ .  $\eta = e^{-\frac{Q\delta^2}{72}}$ , i.e.  $Q = \frac{72 \ln(\frac{1}{\eta})}{\delta^2}$  reparameterization finishes the proof of Theorem 2.

**B. Technical Lemmas**
**Lemma 3 (Supremum).**

$$\left| \sup_f a_f - \sup_f b_f \right| \leq \sup_f |a_f - b_f|.$$

**Lemma 4 (Bounded difference property of  $Z$ ).** Let  $N \in \mathbb{Z}^+$ ,  $(S_q)_{q \in [Q]}$  be a partition of  $[N]$ ,  $K : \mathcal{X} \times \mathcal{X} \rightarrow \mathbb{R}$  be a kernel,  $\mu$  be the mean embedding associated to  $K$ ,  $x_{1:N}$  be i.i.d. random variables on  $\mathcal{X}$ ,  $Z(x_V) = \sup_{f \in B_K} \sum_{q \in U} \left[ \phi \left( \frac{2\langle f, \mu_{S_q} - \mu_{\mathbb{P}} \rangle_K}{\epsilon} \right) - \mathbb{E} \phi \left( \frac{2\langle f, \mu_{S_q} - \mu_{\mathbb{P}} \rangle_K}{\epsilon} \right) \right]$ , where  $U \subseteq [Q]$ ,  $V = \cup_{q \in U} S_q$ . Let  $x'_{V_i}$  be  $x_V$  except for the  $i \in V$ -th coordinate;  $x_i$  is changed to  $x'_i$ . Then

$$\sup_{x_V \in \mathcal{X}^{|V|}, x'_i \in \mathcal{X}} |Z(x_V) - Z(x'_{V_i})| \leq 4, \forall i \in V.$$

*Proof.* Since  $(S_q)_{q \in [Q]}$  is a partition of  $[Q]$ ,  $(S_q)_{q \in U}$  forms a partition of  $V$  and there exists a unique  $r \in U$  such that  $i \in S_r$ . Let

$$Y_q := Y_q(f, x_V),$$

$$q \in U = \phi \left( \frac{2\langle f, \mu_{S_q} - \mu_{\mathbb{P}} \rangle_K}{\epsilon} \right) - \mathbb{E} \phi \left( \frac{2\langle f, \mu_{S_q} - \mu_{\mathbb{P}} \rangle_K}{\epsilon} \right),$$

$$Y'_r := Y_r(f, x'_{V_i}).$$

In this case

$$\begin{aligned}
 & |Z(x_V) - Z(x'_{V_i})| \\
 & = \left| \sup_{f \in B_K} \sum_{q \in U} Y_q - \sup_{f \in B_K} \left( \sum_{q \in U \setminus \{r\}} Y_q + Y'_r \right) \right| \\
 & \stackrel{(a)}{\leq} \sup_{f \in B_K} |Y_r - Y'_r| \stackrel{(b)}{\leq} \sup_{f \in B_K} \left( \underbrace{|Y_r|}_{\leq 2} + \underbrace{|Y'_r|}_{\leq 2} \right) \leq 4,
 \end{aligned}$$

where in (a) we used Lemma 3, (b) the triangle inequality and the boundedness of  $\phi$  [ $|\phi(t)| \leq 1$  for all  $t$ ].  $\square$

**Lemma 5 (Uniformly bounded separable Carathéodory family).** Let  $\epsilon > 0$ ,  $N \in \mathbb{Z}^+$ ,  $Q \in \mathbb{Z}^+$ ,  $M = N/Q \in \mathbb{Z}^+$ ,  $\phi(t) = (t-1)\mathbb{I}_{1 \leq t \leq 2} + \mathbb{I}_{t \geq 2}$ ,  $K : \mathcal{X} \times \mathcal{X} \rightarrow \mathbb{R}$  is a continuous kernel on the separable topological domain  $\mathcal{X}$ ,  $\mu$  is the mean embedding associated to  $K$ ,  $\mathbb{P}_M := \frac{1}{M} \sum_{m=1}^M \delta_{u_m}$ ,  $\mathcal{G} = \{g_f : f \in B_K\}$ , where  $g_f : \mathcal{X}^M \rightarrow \mathbb{R}$  is defined as

$$g_f(u_{1:M}) = \phi \left( \frac{2\langle f, \mu_{\mathbb{P}_M} - \mu_{\mathbb{P}} \rangle_K}{\epsilon} \right).$$

Then  $\mathcal{G}$  is a uniformly bounded separable Carathéodory family: (i)  $\sup_{f \in B_K} \|g_f\|_\infty < \infty$  where  $\|g\|_\infty = \sup_{u_{1:M} \in \mathcal{X}^M} |g(u_{1:M})|$ , (ii)  $u_{1:M} \mapsto g_f(u_{1:M})$  is measurable for all  $f \in B_K$ , (iii)  $f \mapsto g_f(u_{1:M})$  is continuous for all  $u_{1:M} \in \mathcal{X}^M$ , (iv)  $B_K$  is separable.

*Proof.*

- (i)  $|\phi(t)| \leq 1$  for any  $t$ , hence  $\|g_f\|_\infty \leq 1$  for all  $f \in B_K$ .
- (ii) Any  $f \in B_K$  is continuous since  $\mathcal{H}_K \subset C(\mathcal{X}) = \{h : \mathcal{X} \rightarrow \mathbb{R} \text{ continuous}\}$ , so  $u_{1:M} \mapsto (f(u_1), \dots, f(u_M))$  is continuous.  $\phi$  is Lipschitz, specifically continuous. The continuity of these two maps imply that of  $u_{1:M} \mapsto g_f(u_{1:M})$ , specifically it is Borel-measurable.
- (iii) The statement follows by the continuity of  $f \mapsto \langle f, h \rangle_K$  ( $h = \mu_{\mathbb{P}_M} - \mu_{\mathbb{P}}$ ) and that of  $\phi$ .
- (iv)  $B_K$  is separable since  $\mathcal{H}_K$  is so by assumption.  $\square$

## C. External Lemma

Below we state the McDiarmid inequality for self-containedness.

**Lemma 6** (McDiarmid inequality). *Let  $x_{1:N}$  be  $\mathcal{X}$ -valued independent random variables. Assume that  $f : \mathcal{X}^N \rightarrow \mathbb{R}$  satisfies the bounded difference property*

$$\sup_{u_1, \dots, u_N, u'_n \in \mathcal{X}} |f(u_{1:N}) - f(u'_{1:N})| \leq c, \quad \forall n \in [N],$$

where  $u'_{1:N} = (u_1, \dots, u_{n-1}, u'_n, u_{n+1}, \dots, u_N)$ . Then for any  $\tau > 0$

$$\mathbb{P} \left( f(x_{1:N}) < \mathbb{E}_{x_{1:N}} [f(x_{1:N})] + c \sqrt{\frac{\tau N}{2}} \right) \geq 1 - e^{-\tau}.$$

## D. Pseudocode of Experiment-2

The pseudocode of the two-sample test conducted in Experiment-2 is summarized in Algorithm 3.

---

### Algorithm 3 Two-sample test (Experiment-2)

---

**Input:** Two samples:  $(X_n)_{n \in [N]}$ ,  $(Y_n)_{n \in [N]}$ . Number of bootstrap permutations:  $B \in \mathbb{Z}^+$ . Level of the test:  $\alpha \in (0, 1)$ . Kernel function with hyperparameter  $\theta \in \Theta$ :  $K_\theta$ . Split the dataset randomly into 3 equal parts:

$$[N] = \bigcup_{i=1}^3 I_i, \quad |I_1| = |I_2| = |I_3|.$$

Tune the hyperparameters using the 1st part of the dataset:

$$\hat{\theta} = \operatorname{argmax}_{\theta \in \Theta} J_\theta := \widehat{\text{MMD}}_\theta((X_n)_{n \in I_1}, (Y_n)_{n \in I_1}).$$

Estimate the  $(1 - \alpha)$ -quantile of  $\widehat{\text{MMD}}_{\hat{\theta}}$  under the null, using  $B$  bootstrap permutations from  $(X_n)_{n \in I_2} \cup (Y_n)_{n \in I_2}$ :  $\hat{q}_{1-\alpha}$ .

Compute the test statistic on the third part of the dataset:

$$T_{\hat{\theta}} = \widehat{\text{MMD}}_{\hat{\theta}}((X_n)_{n \in I_3}, (Y_n)_{n \in I_3}).$$

**Output:**  $T_{\hat{\theta}} - \hat{q}_{1-\alpha}$ .

---
